# Supplementary material for: The leukemic oncogene EVI1 hijacks a MYC super-enhancer by CTCF-facilitated loops
Source: PubMed Central journal article supplement (PMC8479123; doi:10.1038/s41467-021-25862-3), 2021-09-28
Supplement: 41467_2021_25862_MOESM3_ESM.pdf [file 41467_2021_25862_MOESM3_ESM.pdf]

## Description of Additional Supplementary Files

**File Name:** Supplementary Data 1

**Description:** Excel file with multiple tabs listing sgRNAs for CRISPR-Cas9 genome editing, qPCR primers, amplicon sequencing primers, PCR primers and 4C primers.
